# Supplementary material
Source: PubMed Central journal article supplement (PMC9363535)
Supplement: NIHMS1776014-supplement-Supp1.pdf [file NIHMS1776014-supplement-Supp1.pdf]

Supplemental Figure 1. PRISMA flow diagram of literature search.

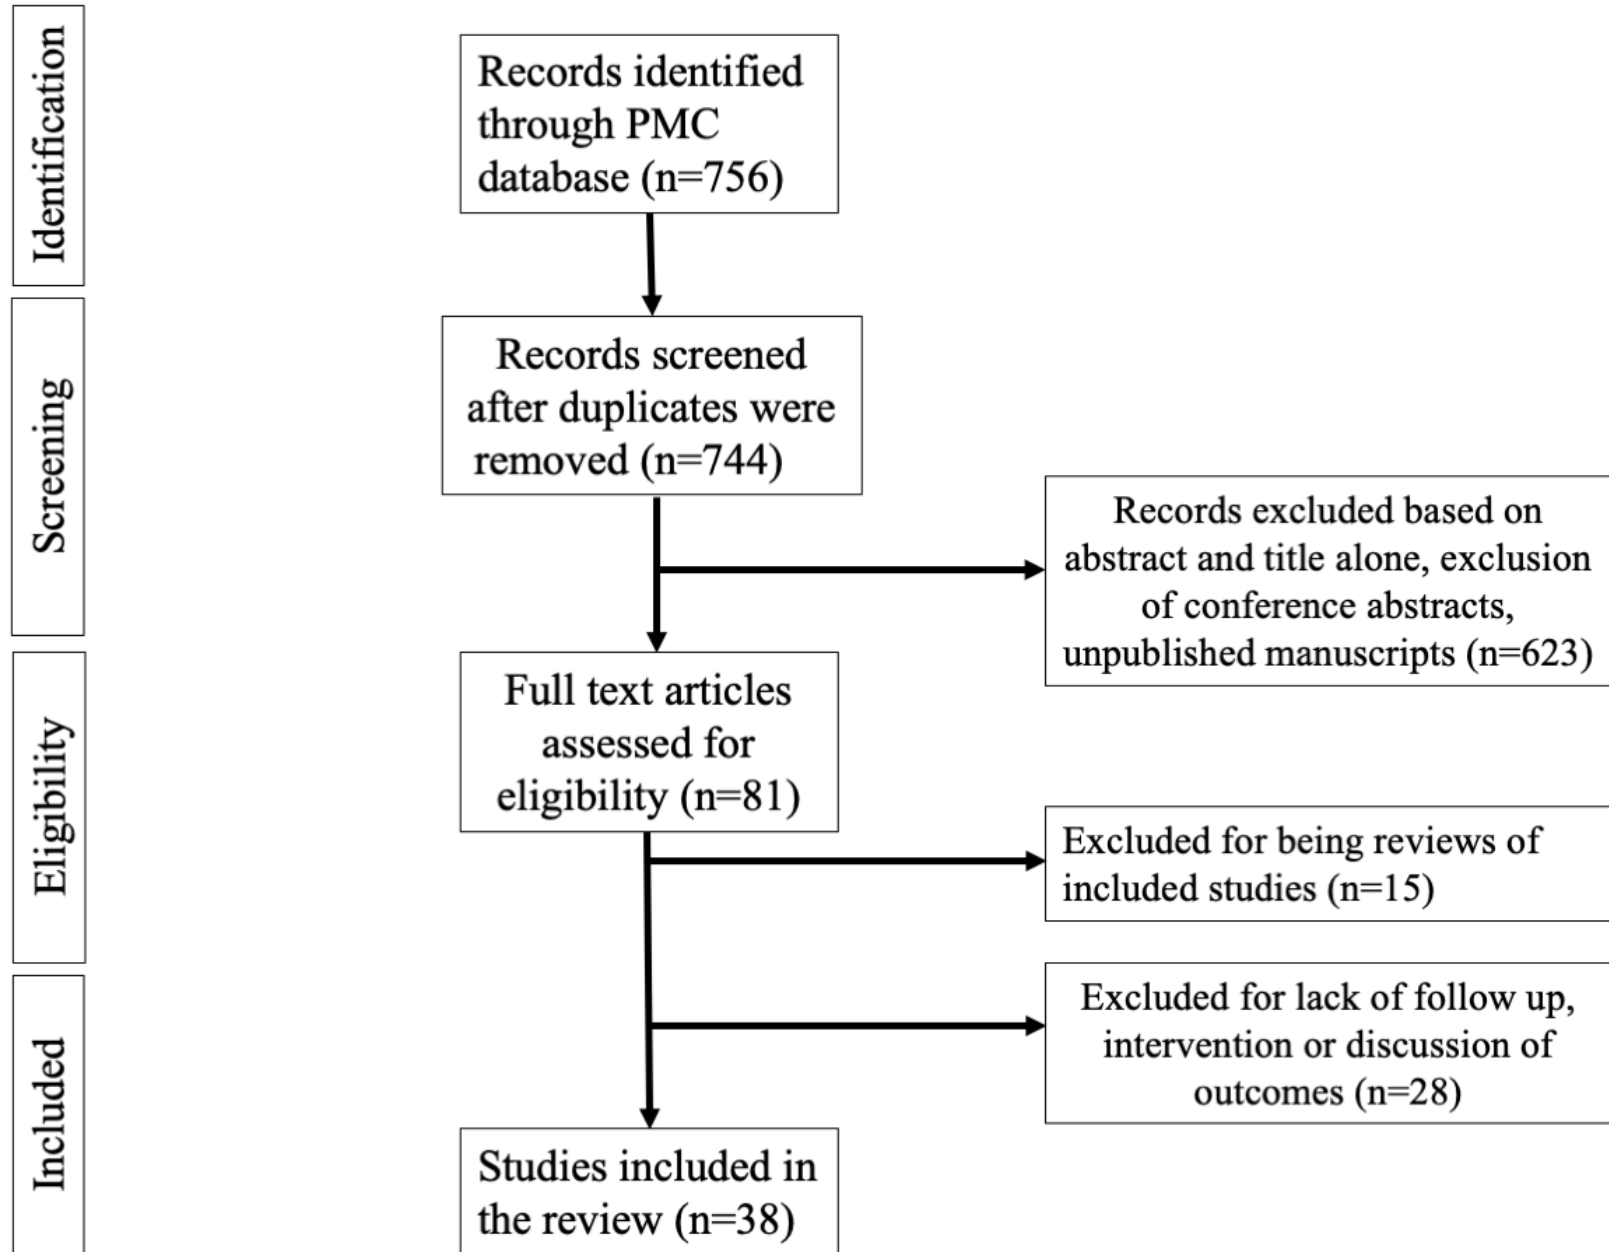

**Supplemental Table 1. Literature review of treatment of pulsatile tinnitus' causes.** The myriad causes of pulsatile tinnitus have been treated by different modalities with varying levels of success and duration of follow-up. Prospective randomized trials are needed to better define appropriate treatment algorithms.

|                    | <b>Cause</b>                           | <b>Management</b>      | <b>Intervention</b>                                                        | <b>Study Size (n = )</b> | <b>Study Design</b> | <b>Results</b><br><b>Technical Success (%)</b><br><b>Clinical Success (% follow up period)</b><br><b>Complication rate (% major complication of death/stroke, follow up period)</b> | <b>Limitations</b>                          | <b>Reference</b>              |
|--------------------|----------------------------------------|------------------------|----------------------------------------------------------------------------|--------------------------|---------------------|-------------------------------------------------------------------------------------------------------------------------------------------------------------------------------------|---------------------------------------------|-------------------------------|
| Vascular: Arterial | Atherosclerotic carotid artery disease | Surgery                | Carotid endarterectomy                                                     | 14                       | Case series         | 100% technical success<br>71% reported symptom relief at 6 week follow up<br>0% stroke/death rate                                                                                   | Retrospective study                         | Kirby-Bott and Gibbs 2004 [1] |
|                    | Atherosclerotic carotid artery disease | Endovascular Treatment | Carotid artery angioplasty and stenting                                    | 2                        | Case series         | 100% technical success<br>100% clinical success<br>0% complications                                                                                                                 | Stenotic lesions < 15 mm, small sample size | Inh et al 2013 [2]            |
|                    | Atherosclerotic carotid artery disease | Endovascular treatment | Simultaneous extracranial endarterectomy and primary intrapetrous stenting | 1                        | Case report         | 100% technical success<br>100% clinical success<br>0% complication rate                                                                                                             | No follow up                                | Emery et al 1998 [3]          |
|                    | Atherosclerotic carotid artery disease | Endovascular treatment | Simultaneous extracranial endarterectomy and primary intrapetrous stenting | 1                        | Case report         | 100% technical success<br>100% clinical success,<br>asymptomatic for 19 months<br>0% complication                                                                                   | Small sample size                           | Hartung et al 2004 [4]        |
|                    | Intracranial arterial aneurysms        | Endovascular Treatment | Coil embolization                                                          | 1                        | Case report         | 100% technical success<br>100% clinical success for 4 years<br>0% complications                                                                                                     | Sample size                                 | Kim et al 2018 [5]            |

|  |                                |                                  |                                                                                             |   |             |                                                                                                                                                   |                                                             |                          |
|--|--------------------------------|----------------------------------|---------------------------------------------------------------------------------------------|---|-------------|---------------------------------------------------------------------------------------------------------------------------------------------------|-------------------------------------------------------------|--------------------------|
|  | Intracranial arterial aneurysm | Endovascular treatment           | Coil embolization                                                                           | 1 | Case report | 100% technical success<br>100% clinical success up to 6 months<br>0% complication                                                                 | Sample size                                                 | Kim et al 2012 [6]       |
|  | Intracranial arterial aneurysm | Endovascular treatment           | Balloon embolization                                                                        | 1 | Case report | 100% technical success<br>100% clinical success for 6 months<br>0% serious complication, ear pain after treatment                                 | Sample size                                                 | Willinsky et al 1987 [7] |
|  | Arteriovenous malformations    |                                  |                                                                                             |   |             |                                                                                                                                                   |                                                             |                          |
|  | Facial AVM                     | Endovascular Treatment           | Coil embolization of superficial temporal artery                                            | 1 | Case report | 100% technical success<br>100% clinical success for 8 years<br>0% complication                                                                    | Sample size                                                 | Chen et al 2018          |
|  | External ear AVM               | Endovascular treatment           | Preoperative embolization with surgical excision                                            | 1 | Case report | 100% technical success<br>100% clinical success<br>0% complication                                                                                | Sample size<br>Indirect symptom assessment at 2 year period | Woo et al 2008 [9]       |
|  | Parotid gland AVM              | Surgery                          | Surgical ligation with partial resection of the left STA; parotidectomy                     | 1 | Case report | 100% technical success<br>0% clinical success, persistent tinnitus after first surgery, then 100% clinical success with second<br>0% complication | Sample size, multiple surgeries                             | Selleck et al 2020 [10]  |
|  | Auricular AVM                  | Endovascular treatment + surgery | Pre-operative transarterial embolization with TFCA, glue and subsequent total mass excision | 1 | Case report | 100% technical success<br>100% clinical success<br>100% complication – with ischemic skin necrosis                                                | Sample size                                                 | Kim et al 2017 [11]      |
|  |                                |                                  |                                                                                             | 1 | Case report |                                                                                                                                                   | Sample size                                                 | Aslan et al 2017         |

|  |                                                     |                                                            |                                                                                                                   |    |             |                                                                                                                                         |                                |                                |
|--|-----------------------------------------------------|------------------------------------------------------------|-------------------------------------------------------------------------------------------------------------------|----|-------------|-----------------------------------------------------------------------------------------------------------------------------------------|--------------------------------|--------------------------------|
|  | External auditory canal/temporal bone AVM           | Endovascular treatment + surgery                           | PVA embolization and subsequent surgical excision                                                                 |    |             | <100% clinical success, with subsequent 100% technical success after surgery, 100% clinical success for up to 3 years, 0% complications |                                | [12]                           |
|  | Transverse sigmoid sinus dural AVM                  | Endovascular treatment                                     | Coiling with dural venous occlusions                                                                              | 1  | Case report | 100% technical success<br>100% clinical success, 18 mo<br>0% complications                                                              | Sample size                    | de Paula Lucas et al 2010 [13] |
|  | Marginal sinus fistulas                             | Endovascular treatment (88%), surgical (4%), combined (8%) | Transvenous (76%), transarterial (14%), combined (10%)                                                            | 29 | Case series | 96% technical success<br>75% resolution of symptoms, 25% partial improvement in symptoms, 12% complications                             | Various treatment modalities   | Caton et al 2021 [14]          |
|  | Condylar vein fistulas (anterior + posterior)       | Endovascular treatment                                     | Transvenous embolization                                                                                          | 6  | Case series | 100% technical success<br>100% clinical success, 2 y<br>0% complications, 2 y                                                           | Sample size                    | Hellstern et al 2019 [15]      |
|  | Posterior condylar canal fistula                    | Endovascular treatment                                     | Transvenous embolization                                                                                          | 1  | Case report | 100% technical success<br>100% clinical success<br>0% complications                                                                     | Sample size                    | Brinjikji et al 2020 [16]      |
|  | Traumatic CCF                                       | Endovascular treatment                                     | Transvenous and transarterial coil embolization                                                                   | 1  | Case report | 100% technical success<br>100% clinical success, 7 weeks<br>0% complications                                                            | Sample size<br>Short follow up | Lerut et al 2007 [17]          |
|  | Persistent primitive trigeminal artery aneurysm/CCF | Endovascular treatment                                     | Coil and onyx embolization                                                                                        | 1  | Case report | 100% technical success<br>100% clinical success, 3 mo<br>0% complications, 3 mo                                                         | Sample size<br>Short follow up | Fan et al 2019 [18]            |
|  | CCF/Internal Carotid Artery Aneurysm                | Surgery + Endovascular treatment                           | Embolization of cavernous sinus and fistula with superficial temporal artery + MCA anastomosis with ICA occlusion | 1  | Case report | 100% technical success<br>100% clinical success, 2 months<br>0% complication                                                            | Sample size                    | Nakahara et al 2019[19]        |

|                  |                                              |                                     |                                                                        |     |                                      |                                                                                                |                                      |                           |
|------------------|----------------------------------------------|-------------------------------------|------------------------------------------------------------------------|-----|--------------------------------------|------------------------------------------------------------------------------------------------|--------------------------------------|---------------------------|
|                  |                                              |                                     |                                                                        |     |                                      |                                                                                                |                                      |                           |
|                  | Rete mirabile                                | Conservative management             | Conservative management                                                | 1   | Case report                          | N/A technical success<br>0% clinical success, 6 mo<br>0% complications                         | Lack of clinical success             | Mondel et al 2017[20]     |
|                  | Aberrant internal carotid artery             | Surgery                             | Endoaural approach surgical myringoplasty                              | 1   | Case report                          | 100% technical success<br>100% clinical success, 1 y follow up<br>0% complications, 1 y        | Sample size                          | Honkura et al 2014 [21]   |
|                  | Aberrant internal carotid artery             | Surgery                             | Separation of aberrant ICA from promontorium tympani and coagulation   | 1   | Case report                          | 100% technical success<br>100% clinical success, 7 mo<br>0% complications, 7 mo                | Sample size                          | Song et al 2012 [22]      |
|                  | Duplicated, aberrant internal carotid artery | Conservative management             | Conservative management with regular follow up                         | 1   | Case report                          | N/A technical success<br>0% clinical success at 1 year<br>N/A complications                    | Sample size                          | Anagiotos et al 2019 [23] |
|                  | Aberrant internal carotid artery             | Surgery                             | Placement of tragal cartilage over carotid canal                       | 1   | Case report                          | 100% technical success<br>100% clinical success, 3 mo<br>0% complications, 3 mo                | Sample size, no long-term follow up  | Hashim et al 2021[24]     |
|                  | Aneurysm of an aberrant ICA                  | Endovascular treatment + Surgery    | Endovascular internal trapping and common carotid artery to MCA bypass | 1   | Case report                          | 100% technical success<br>100% clinical success, 6 months<br>0% complications                  | Sample size                          | Kawamura et al 2017[25]   |
|                  | Persistent stapedia artery                   | Surgery                             | Resection of PSA                                                       | 1   | Case report                          | 100% technical success<br>100% clinical success, immediate<br>0% complications, immediate      | Lack of long term follow up          | Murphy et al 1995 [26]    |
|                  |                                              | Surgery                             | Stapedotomy                                                            | 1   | Case report                          | 100% technical success<br>100% clinical success, immediate<br>0% complications, immediate      | Lack of long term follow up          | Pirodda et al 1994[27]    |
| Vascular: Venous | Idiopathic intracranial hypertension         | Lifestyle modifications Medications | Weight reduction and acetazolamide                                     | 165 | Multicenter double blind, randomized | N/A technical success<br>Decreased papilledema in acetazolamide + weight reduction group, 6 mo | Resolution of pulsatile tinnitus was | NORDIC Trial 2014 [28]    |

|  |  |                                          |                                               |     |                                      |                                                                                                                    |                                                                                         |                           |
|--|--|------------------------------------------|-----------------------------------------------|-----|--------------------------------------|--------------------------------------------------------------------------------------------------------------------|-----------------------------------------------------------------------------------------|---------------------------|
|  |  |                                          | versus weight reduction only                  |     |                                      | 0% complications, 6 mo                                                                                             | not a primary outcome                                                                   |                           |
|  |  | Endovascular Treatment                   | Stenting                                      | 154 | Systematic review                    | 100% technical success<br>90% clinical success, variable follow up                                                 | Variable follow up; discussion of complications limited                                 | Nicholson et al 2019 [29] |
|  |  | Surgery                                  | Bariatric surgery                             | 22  | Single center retrospective study    | 100% technical success<br>95% clinical success, 1 year<br>0% major complications, 1 years                          | 4 patients lost to follow up, lack of control group                                     | Sugerman et al 1999 [30]  |
|  |  | Endovascular treatment                   | Venous stenting                               | 15  | Single center retrospective analysis | 100% technical success<br>79% clinical success, 14 mo<br>0% complication                                           | Lack of control group                                                                   | Fields et al 2013 [31]    |
|  |  | Endovascular treatment                   | Venous stenting                               | 29  | Single center prospective analysis   | 100% technical success<br>90% clinical success, 12 mo<br>0% complications, 12 mo                                   | Lack of control group                                                                   | Boddu et al 2016 [32]     |
|  |  | Endovascular treatment                   | Venous stenting                               | 79  | Single center retrospective analysis | 100% technical success<br>86% clinical success, 18 mo<br>0% complications                                          | Pulsatile tinnitus not a primary outcome, primary outcome was elevated opening pressure | Kahan et al 2021 [33]     |
|  |  | Endovascular treatment                   | Venous stenting                               | 81  | Single center prospective analysis   | 100% technical success<br>46% clinical success, 10 mo<br>0% complications, 10 mo                                   | Pre-intervention pulsatile tinnitus scoring was not performed                           | Garner et al 2021 [34]    |
|  |  | Surgery versus weight management program | Bariatric Surgery (Roux-en-Y gastric bypass), | 66  | Multicenter Randomized control trial | 100% technical success<br>Significant decrease in ICP in bariatric surgery group, 12 mo<br>0% complications, 12 mo | Pulsatile tinnitus was                                                                  | Mollan et al 2021 [35]    |

|  |  |         |                                        |     |                               |                                                                                                  |                                                                                                                                   |                         |
|--|--|---------|----------------------------------------|-----|-------------------------------|--------------------------------------------------------------------------------------------------|-----------------------------------------------------------------------------------------------------------------------------------|-------------------------|
|  |  |         | weight management                      |     |                               |                                                                                                  |                                                                                                                                   |                         |
|  |  | Various | Optic nerve sheath fenestration        | 712 | Systematic review/metanalysis | 100% technical success<br>80% clinical success (papilledema), 21 mo<br>1.5% complications, 21 mo | not a primary outcome; three different types of bariatric surgery were offered to patients; predominantly female study population | Satti et al 2015 [36]   |
|  |  |         | CSF diversion                          | 435 |                               | 100% technical success<br>97% clinical success, 23 mo<br>2.9% complications, 23 mo               |                                                                                                                                   |                         |
|  |  |         | Venous stenting                        | 136 |                               | 100% technical success<br>64% clinical success (visual acuity), 42 mo<br>0% complications, 42 mo |                                                                                                                                   |                         |
|  |  | Various | Optic nerve sheath fenestration        | 341 | Systemic review/meta-analysis | 100% technical success<br>67% clinical success, 44 mo<br>0% complications, 44 mo                 | Pulsatile tinnitus was not a primary outcome                                                                                      | Kalyvas et al 2017 [37] |
|  |  |         | CSF Diversion/Lumboperitoneal shunting | 128 |                               | 100% technical success<br>69% clinical success, 40 mo<br>0% complications, 40 mo                 |                                                                                                                                   |                         |
|  |  |         | Ventriculoperitoneal shunting          | 26  |                               | 100% technical success<br>65% clinical success, 22 mo<br>4% complications, 22 mo                 |                                                                                                                                   |                         |
|  |  |         | Venous sinus stenting                  | 136 |                               |                                                                                                  |                                                                                                                                   |                         |

|  |                                                                                  |                        |                                                                                 |   |                           |                                                                                                                  |                                                                        |                            |
|--|----------------------------------------------------------------------------------|------------------------|---------------------------------------------------------------------------------|---|---------------------------|------------------------------------------------------------------------------------------------------------------|------------------------------------------------------------------------|----------------------------|
|  |                                                                                  |                        |                                                                                 |   |                           |                                                                                                                  |                                                                        |                            |
|  | Abnormalities of the jugular bulb                                                |                        |                                                                                 |   |                           |                                                                                                                  |                                                                        |                            |
|  | Jugular bulb diverticulum                                                        | Endovascular treatment | Coil embolization                                                               | 1 | Case report               | 00% technical success<br>100% clinical success, 10 mo<br>0% complications, 10 months                             | Follow up, sample size                                                 | Mortimer et al 2015 [38]   |
|  | Jugular bulb diverticulum                                                        | Endovascular treatment | WEB                                                                             | 1 | Case report               | 100% technical success,<br>100% clinical success, 2 mo<br>0% complication                                        | Sample size                                                            | Drescher et al 2020 [39]   |
|  | High riding jugular bulb with associated sigmoid sinus stenosis and diverticulum | Endovascular treatment | Stent placement across sigmoid sinus with coil embolization of the diverticulum | 1 | Case report               | 100% technical success,<br>100% clinical success, 16 mo<br>0% complications, 16 mo                               | Sample size                                                            | Trivelato et al 2015 [40]  |
|  | Dehiscent high jugular bulb                                                      | Surgical               | Surgical reconstruction of the middle ear floor                                 | 7 | Retrospective case series | 100% technical success<br>57% clinical success, 28 mo<br>0% major complications, 28 mo<br>14% with increased ICP | Variability in technique in reconstruction of the floor<br>Sample size | El-Begermy et al 2010 [41] |
|  | Dehiscent high jugular bulb                                                      | Surgical               | Separate the tympanic membrane from the jugular bulb using packed Gelfoam       | 1 | Case report               | 100% technical success<br>100% clinical success, 3 y<br>0% complications, 3 y                                    | Sample size                                                            | Shaikh et al 2013 [42]     |
|  | Abnormalities of the transverse/sigmoid sinus                                    |                        |                                                                                 |   |                           |                                                                                                                  |                                                                        |                            |
|  | Dominant sigmoid sinus with focal dehiscence                                     | Surgery                | Transmastoid reconstruction of the sigmoid sinus                                | 8 | Retrospective analysis    | 100% technical success<br>87% clinical success, 9.5 mo<br>0% complications,<br>increased ICP in 13%              | Majority of study participants are female                              | Kim et al 2016 [43]        |
|  | Sigmoid sinus diverticulum                                                       | Endovascular treatment | Coil embolization                                                               | 1 | Case Report               | 100% technical success<br>100% clinical success, 6 mo<br>0% complications, 6 mo                                  | Sample size                                                            | Zenteno et al 2004 [44]    |



|  |                                                               |                                  |                                                              |    |                             |                                                                                                                                                               |                                                                              |                          |
|--|---------------------------------------------------------------|----------------------------------|--------------------------------------------------------------|----|-----------------------------|---------------------------------------------------------------------------------------------------------------------------------------------------------------|------------------------------------------------------------------------------|--------------------------|
|  | Transverse sigmoid sinus diverticulum                         | Endovascular Treatment           | Coil embolization                                            | 1  | Case Report                 | 100% technical success<br>100% clinical success, 1 y<br>0% complication, 1y                                                                                   | Sample size                                                                  | Gard et al 2009 [45]     |
|  | Sigmoid sinus diverticulum                                    |                                  | Coil embolization                                            | 1  | Case Report                 | 100% technical success<br>100% clinical success, 8 mo<br>0% complication, 8 mo                                                                                | Sample size                                                                  | Houdart et al 2000 [46]  |
|  | Sigmoid sinus diverticulum                                    | Endovascular Treatment           | Coil embolization                                            | 1  | Case Report                 | 100% technical success<br>100% clinical success, 12 mo<br>100% complication – cerebellar ischemic stroke, 2 mo                                                | Sample size                                                                  | Sanchez et al 2002 [47]  |
|  | Sigmoid sinus diverticulum                                    | Endovascular treatment           | Balloon assisted embolization                                | 1  | Case Report                 | 100% technical success<br>90% clinical success, 12 mo<br>0% complications, 12 mo                                                                              | Sample size                                                                  | Mehanna et al 2010 [48]  |
|  | Sigmoid sinus diverticulum                                    | Endovascular treatment           | Coil embolization                                            | 1  | Case Report                 | 100% technical success<br>100% clinical success, 6 mo<br>0% complications, 6 mo                                                                               | Sample size, follow up interval                                              | Amans et al 2014 [49]    |
|  | Sigmoid sinus diverticulum with sigmoid sinus wall dehiscence | Surgery, conservative management | Sigmoid sinus wall reconstruction or conservative management | 28 | Retrospective Case Control  | 100% technical success<br>68% clinical success in surgery versus 0% clinical success for those with conservative management, 16 mo<br>0% complications, 16 mo | Variability in surgical techniques used, majority of participants are female | Wang et al 2015 [50]     |
|  | Sigmoid sinus wall abnormalities with diverticulum            | Surgery                          | Transtemporal sinus wall reconstruction                      | 40 | Single center Retrospective | 90% technical success<br>90% clinical success, 1mo<br>0% complications, 1 mo                                                                                  | Short interval follow up                                                     | Eisenman et al 2018 [51] |
|  | Sigmoid sinus wall anomaly                                    | Surgery                          | Transmastoid sigmoid sinus                                   | 40 |                             | 100% technical success                                                                                                                                        |                                                                              | Raghavan et al 2016 [52] |

|                           |                                                                                 |                        |                                                                 |    |                             |                                                                                   |                                                                                                                                                         |                            |
|---------------------------|---------------------------------------------------------------------------------|------------------------|-----------------------------------------------------------------|----|-----------------------------|-----------------------------------------------------------------------------------|---------------------------------------------------------------------------------------------------------------------------------------------------------|----------------------------|
|                           | Venous sinus diverticulum at the junction of the transverse and sigmoid sinuses | Endovascular treatment | wall reconstruction                                             | 2  | Single center retrospective | 100% clinical success, 12 mo<br>0% complications, 12 mo                           | Follow up period was variable/not discussed for every patient                                                                                           | Shastri et al 2017 [53]    |
|                           | Lateral sinus stenosis                                                          | Endovascular treatment | Coil embolization                                               | 14 | Case series                 | 100% technical success<br>93% clinical success, 12 mo<br>0% complications         | Sample size                                                                                                                                             | Lenck et al 2017 [54]      |
|                           |                                                                                 |                        | Venous stenting                                                 |    | Case series                 |                                                                                   | Unblinded assessment, 2 patients had IHH                                                                                                                |                            |
|                           | Dilated mastoid emissary vein                                                   | Endovascular treatment | Embolization                                                    | 6  | Case series                 | 100% technical success<br>33% clinical success, 6 mo<br>0% complications, 6 mo    | Sample size, clinically successful only in patients with venous PT (versus neutral PT where pre-operative vascular compression did not change symptoms) | Eliezer et al 2020 [55]    |
|                           | Dilated mastoid emissary vein                                                   | Endovascular treatment | Transvenous embolization of large dilated mastoid emissary vein | 1  | Case report                 | 100% technical success<br>100% clinical success, 6 mo<br>0% complications, 6 mo   | Sample size                                                                                                                                             | Abdalkader et al 2021 [56] |
|                           | Dilated mastoid emissary vein                                                   | Surgery                | Surgical clipping of mastoid emissary vein                      | 1  | Case report                 | 100% technical success<br>100% clinical success, 3 y<br>0% complications, 3 y     | Sample size                                                                                                                                             | Kim et al 2021 [57]        |
| Non-vascular - Structural | Glomus tumor                                                                    | Radiation              | Gamma knife                                                     | 53 | Multicenter-retrospective   | 100% technical success<br>49% clinical success, 50.5 mo<br>0% complications, 50.5 | Variability in follow up (5-220 mo)                                                                                                                     | Sheehan et al 2012 [58]    |
|                           | Glomus tumor                                                                    | Radiation              | Gamma knife                                                     | 10 |                             | 100% technical success                                                            |                                                                                                                                                         |                            |

|    |                                        |                                    |                                                                         |                                                                                      |                                                                                      |                                                                                                                                                       |                                                                                                          |                                                          |
|----|----------------------------------------|------------------------------------|-------------------------------------------------------------------------|--------------------------------------------------------------------------------------|--------------------------------------------------------------------------------------|-------------------------------------------------------------------------------------------------------------------------------------------------------|----------------------------------------------------------------------------------------------------------|----------------------------------------------------------|
|    | Glomus tumor                           | Surgery and endovascular treatment | Surgery with preoperative embolization using ethanol                    | 6                                                                                    | Single institution retrospective case series<br><br>Case series                      | 40% clinical success, 27.6 mo<br>0% complications, 27.6 mo<br><br>100% technical success<br>100% clinical success, 21.3<br>0% complications, 21. 3 mo | Sample size, variable decreases in tumor size, variable follow up (mean reported)<br><br>Sample size     | Dobberpuhl et al 2016 [59]<br><br>Devuyt et al 2016 [60] |
|    | Superior semicircular canal dehiscence | Surgery                            | Plugging + resurfacing via the middle fossa                             | 12                                                                                   | Case series                                                                          | 100% technical success<br>83% clinical success, 5 mo<br>0% complications, 0 mo                                                                        | Short follow up interval                                                                                 | Chung et al 2016 [61]                                    |
| 12 |                                        |                                    |                                                                         | Case series                                                                          | 100% technical success<br>100% clinical success, 31.1 mo<br>0% complications, 31.1 m | Thomeer et al 2016 [62]                                                                                                                               |                                                                                                          |                                                          |
| 3  |                                        |                                    | Case series                                                             | 100% technical success<br>66% resolution of tinnitus, 4 mo<br>0% complications, 4 mo | Sample size<br>Limited follow up                                                     | Hillman et al 2006 [63]                                                                                                                               |                                                                                                          |                                                          |
|    |                                        |                                    | Transmastoid plugging                                                   | 13                                                                                   | Retrospective case series                                                            | 100% technical success<br>84% clinical success (1 mo-2 y)<br>0% complication                                                                          | Sample size<br>Variable follow up                                                                        | Haesendock et al 2016[64]                                |
|    | Anemia                                 | Medical treatment                  | Supplementation with Vitamin B12                                        | 1                                                                                    | Case report                                                                          | N/a technical success<br>100% clinical success, 3 w<br>0% complications, 3 w                                                                          | Sample size<br>Short term follow up                                                                      | Cochran and Kosmicki 1987 [65]                           |
|    |                                        | Medical treatment                  | Supplementation with iron and or blood transfusions if patients had IDA | 13                                                                                   | Single institution cross sectional study                                             | 100% technical success<br>75% clinical success, 1 mo<br>0% complications, 1 mo                                                                        | Sample size<br>Short term follow-up<br>Female predominant population<br>Not controlled by co-morbidities | Sunwoo et al 2018[66]                                    |

|                         |                     |                                              |                                                                                 |      |                                       |                                                                                                                            |                                                                                                                                           |                       |
|-------------------------|---------------------|----------------------------------------------|---------------------------------------------------------------------------------|------|---------------------------------------|----------------------------------------------------------------------------------------------------------------------------|-------------------------------------------------------------------------------------------------------------------------------------------|-----------------------|
| Non-vascular – Systemic | Subjective tinnitus | Cognitive behavioral therapy                 | Tinnitus retraining counselling + audiological rehabilitation versus usual care | 492  | Double blind randomized control trial | N/A technical success<br>Decreased tinnitus severity p<0.0001) in patients with specialized care, 6 mo<br>0% complications | Multiple components to specialized care arm, difficult to determine which of those interventions contributed to improved patient symptoms | Cima et al 2012 [67]  |
|                         | Chronic tinnitus    | Repetitive transcranial magnetic stimulation | Repetitive transcranial magnetic stimulation                                    | 1228 | Systematic review/<br>Meta-analysis   | 100% technical success<br>Decreased tinnitus severity, 1 mo<br>0% complications                                            | Limited number of studies included in the analysis (29)                                                                                   | Liang et al 2020 [68] |
|                         | Chronic tinnitus    | Repetitive transcranial magnetic stimulation | Repetitive transcranial magnetic stimulation                                    | 233  | Systematic review/<br>Meta-analysis   | 100% technical success<br>No significant difference between control and treatment patients at 4 mo<br>0% complications     | Limited number of studies used (5)                                                                                                        | Meng et al 2011 [69]  |

**Supplemental Figure 2.** A standardized template for venous manometry and balloon test occlusion facilitates evaluation of venous causes of pulsatile tinnitus. Each position is numbered (#1-3 for the superior sagittal sinus, #4-18 even numbers for the right transverse sinus, sigmoid sinus, and jugular vein, and #5-19 odd numbers for the left transverse sinus, sigmoid sinus, and jugular vein). At particular positions, in addition to pressure measurements, we can record pulsatile tinnitus scores with and without balloon test occlusion, as indicated.

**Name:**  **MRN:**

**Date of documentation:**

**Last opening pressure, date:**

**Other demographic comment:**

**Provocative position(s):**  
Rotation L, Rotation R, Flexion, Extension, Valsalva

**Dominance:** Left, Right, Co-Dominant

**Fenestration/Duplications:** SSS RTS LTS

Superior sagittal sinus

Micro / Guide

Torcular

C2  
C3  
C4

**Right**

Transverse sinus

Transverse sigmoid junction

Sigmoid sinus

Jugular bulb

IJV at C1

IJV below C1

R atrium

**Left**

Transverse sinus

Transverse sigmoid junction

Sigmoid sinus

Jugular bulb

IJV at C1

IJV below C1

Brachiocephalic v.

**Venous Drainage**

Internal Jugular System 0 1 2 3 4 5

External Jugular System 0 1 2 3 4 5

Suboccipital - Deep Cervical Network 0 1 2 3 4 5

Paravertebral System 0 1 2 3 4 5

Anterior Condylar Network 0 1 2 3 4 5

Parapharyngeal Network 0 1 2 3 4 5

Perimedullary Network 0 1 2 3 4 5

Transosseous/Emissary 0 1 2 3 4 5

**Balloon Test Occlusion**

| Position (R)  | ↑ ↓ | Position (L)  | ↑ ↓ |
|---------------|-----|---------------|-----|
| 4             |     | 5             |     |
| 6             |     | 7             |     |
| 10            |     | 11            |     |
| 12            |     | 13            |     |
| 14            |     | 15            |     |
| R condylar v. |     | L condylar v. |     |

## References

- 1 Kirkby-Bott J, Gibbs HH. Carotid endarterectomy relieves pulsatile tinnitus associated with severe ipsilateral carotid stenosis. *Eur J Vasc Endovasc Surg Off J Eur Soc Vasc Surg* 2004;**27**:651–3. doi:10.1016/j.ejvs.2004.02.025
- 2 Ihn YK, Jung WS, Kim B-S. Disappeared pulsatile tinnitus related to petrous segment stenosis of the ICA after relief of the stenosis by stenting. *Interv Neuroradiol J Peritherapeutic Neuroradiol Surg Proced Relat Neurosci* 2013;**19**:97–101. doi:10.1177/159101991301900115
- 3 Emery DJ, Ferguson RD, Williams JS. Pulsatile tinnitus cured by angioplasty and stenting of petrous carotid artery stenosis. *Arch Otolaryngol Head Neck Surg* 1998;**124**:460–1. doi:10.1001/archotol.124.4.460
- 4 Hartung O, Alimi YS, Juhan C. Tinnitus resulting from tandem lesions of the internal carotid artery: combined extracranial endarterectomy and intrapetrous primary stenting. *J Vasc Surg* 2004;**39**:679–81. doi:10.1016/j.jvs.2003.10.034
- 5 Kim S-M, Kim C-H, Lee C-Y. Petrous Carotid Aneurysm Causing Pulsatile Tinnitus: Case Report and Review of the Literature. *J Cerebrovasc Endovasc Neurosurg* 2018;**20**:35–9. doi:10.7461/jcen.2018.20.1.35
- 6 Kim D-K, Shin YS, Lee JH, *et al.* Pulsatile Tinnitus as the Sole Manifestation of an Internal Carotid Artery Aneurysm Successfully Treated by Coil Embolization. *Clin Exp Otorhinolaryngol* 2012;**5**:170–2. doi:10.3342/ceo.2012.5.3.170
- 7 Willinsky R, Lasjaunias P, Pruvost P, *et al.* Petrous internal carotid aneurysm causing epistaxis: balloon embolization with preservation of the parent vessel. *Neuroradiology* 1987;**29**:570–2. doi:10.1007/BF00350444
- 8 Chao Chen M, Wann Lin C. Facial Arteriovenous Malformation with Pulsatile Tinnitus: A Potentially Curable Cause of Chronic Insomnia. *Neuropsychiatry* 2018;**08**. doi:10.4172/Neuropsychiatry.1000364
- 9 Woo H-J, Song S-Y, Kim Y-D, *et al.* Arteriovenous malformation of the external ear: A case report. *Auris Nasus Larynx* 2008;**35**:556–8. doi:10.1016/j.anl.2007.11.005
- 10 Selleck AM, O’Connell B, Patel S, *et al.* Intraparotid Superficial Temporal Artery Arteriovenous Malformation Causing Persistent Pulsatile Tinnitus. *Otol Neurotol* 2020;**41**:e873. doi:10.1097/MAO.0000000000002666
- 11 Kim SH, Han SH, Song Y, *et al.* Arteriovenous malformation of the external ear: a clinical assessment with a scoping review of the literature. *Braz J Otorhinolaryngol* 2017;**83**:683–90. doi:10.1016/j.bjorl.2016.09.004
- 12 Aslan S, Yavuz H, Cagici AC, *et al.* Embolisation of an extensive arteriovenous malformation of the temporal region as an alternate treatment: case report. *J Laryngol Otol* 2008;**122**:737–40. doi:10.1017/S0022215108001977
- 13 de Paula Lucas C, Prandini MN, Spelle L, *et al.* Parallel transverse-sigmoid sinus harboring dural arteriovenous malformation. How to differentiate the pathological and normal sinus in order to treat and preserve patency and function. *Acta Neurochir (Wien)* 2010;**152**:523–7. doi:10.1007/s00701-009-0423-1
- 14 Caton MT, Narsinh KH, Baker A, *et al.* Endovascular treatment strategy, technique, and outcomes for dural arteriovenous fistulas of the marginal sinus region. *J NeuroInterventional Surg* Published Online First: 26 May 2021. doi:10.1136/neurintsurg-2021-017476

- 15 Hellstern V, Aguilar-Pérez M, Schob S, *et al.* Endovascular Treatment of Dural Arteriovenous Fistulas of the Anterior or Posterior Condylar Vein. *Clin Neuroradiol* 2019;**29**:341–9. doi:10.1007/s00062-018-0669-1
- 16 Brinjikji W, Lanzino G, Cloft HJ. Transvenous embolization of a posterior condylar canal fistula causing pulsatile tinnitus. *J NeuroInterventional Surg* Published Online First: 17 August 2020. doi:10.1136/neurintsurg-2020-016280
- 17 Lerut B, Vuyst CD, Ghekiere J, *et al.* Post-traumatic pulsatile tinnitus: the hallmark of a direct carotico-cavernous fistula. *J Laryngol Otol* 2007;**121**:1103–7. doi:10.1017/S0022215107005890
- 18 Fan Y, Li Y, Zhang T, *et al.* Carotid-Cavernous Sinus Fistula caused by Persistent Primitive Trigeminal Artery Aneurysm rupture: A case report. *J Stroke Cerebrovasc Dis Off J Natl Stroke Assoc* 2019;**28**:104306. doi:10.1016/j.jstrokecerebrovasdis.2019.104306
- 19 Nakahara M, Uozumi Y, Chiba Y, *et al.* Direct Carotid Cavernous Fistula Due to Rupture of a Cavernous Carotid Aneurysm Embedded Within a Prolactinoma After Cabergoline Administration. *World Neurosurg* 2019;**122**:495–9. doi:10.1016/j.wneu.2018.11.071
- 20 Mondel PK, Saraf R, Limaye US. Republished: Rete mirabile associated with pial arteriovenous fistula: imaging features with literature review. *J NeuroInterventional Surg* 2017;**9**:e36–e36. doi:10.1136/neurintsurg-2016-012939.rep
- 21 Honkura Y, Hidaka H, Ohta J, *et al.* Surgical treatment for the aberrant internal carotid artery in the middle ear with pulsatile tinnitus. *Auris Nasus Larynx* 2014;**41**:215–8. doi:10.1016/j.anl.2013.10.002
- 22 Song Y-S, Yuan Y-Y, Wang G-J, *et al.* Aberrant internal carotid artery causing objective pulsatile tinnitus and conductive hearing loss. *Acta Otolaryngol (Stockh)* 2012;**132**:1126–30. doi:10.3109/00016489.2012.684400
- 23 Anagiotos A, Kazantzi M, Tapis M. Aberrant internal carotid artery in the middle ear: the duplication variant. *BMJ Case Rep CP* 2019;**12**:e228865. doi:10.1136/bcr-2018-228865
- 24 Hashim ND, Jang SH, Moon IS. Endoscopic Intervention of Aberrant Carotid Artery in the Middle Ear. *Otol Neurotol* 2021;**42**:e82. doi:10.1097/MAO.0000000000002865
- 25 Kawamura Y, Sayama T, Maehara N, *et al.* Ruptured Aneurysm of an Aberrant Internal Carotid Artery Successfully Treated with Simultaneous Intervention and Surgery in a Hybrid Operating Room. *World Neurosurg* 2017;**102**:695.e1–695.e5. doi:10.1016/j.wneu.2017.03.133
- 26 Murphy null, Seidman null, Baugh null. Can a Persistent Stapedial Artery be Safely and Effectively Removed? A Case Report with Therapeutic Implications. *Int Tinnitus J* 1995;**1**:147–52.
- 27 Pirodda A, Sorrenti G, Marliani AF, *et al.* Arterial anomalies of the middle ear associated with stapes ankylosis. *J Laryngol Otol* 1994;**108**:237–9. doi:10.1017/s0022215100126398
- 28 NORDIC Idiopathic Intracranial Hypertension Study Group Writing Committee, Wall M, McDermott MP, *et al.* Effect of acetazolamide on visual function in patients with idiopathic intracranial hypertension and mild visual loss: the idiopathic intracranial hypertension treatment trial. *JAMA* 2014;**311**:1641–51. doi:10.1001/jama.2014.3312
- 29 Nicholson P, Brinjikji W, Radovanovic I, *et al.* Venous sinus stenting for idiopathic intracranial hypertension: a systematic review and meta-analysis. *J NeuroInterventional Surg* 2019;**11**:380–5. doi:10.1136/neurintsurg-2018-014172

- 30 Sugerman HJ, Felton WL, Sismanis A, *et al.* Gastric Surgery for Pseudotumor Cerebri Associated With Severe Obesity. *Ann Surg* 1999;**229**:634.
- 31 Fields JD, Javedani PP, Falardeau J, *et al.* Dural venous sinus angioplasty and stenting for the treatment of idiopathic intracranial hypertension. *J NeuroInterventional Surg* 2013;**5**:62–8. doi:10.1136/neurintsurg-2011-010156
- 32 Boddu S, Dinkin M, Suurna M, *et al.* Resolution of Pulsatile Tinnitus after Venous Sinus Stenting in Patients with Idiopathic Intracranial Hypertension. *PLOS ONE* 2016;**11**:e0164466. doi:10.1371/journal.pone.0164466
- 33 Kahan J, Sundararajan S, Brown K, *et al.* Predicting the need for retreatment in venous sinus stenting for idiopathic intracranial hypertension. *J NeuroInterventional Surg* 2021;**13**:574–9. doi:10.1136/neurintsurg-2020-016550
- 34 Garner RM, Aldridge JB, Wolfe SQ, *et al.* Quality of life, need for retreatment, and the re-equilibration phenomenon after venous sinus stenting for idiopathic intracranial hypertension. *J NeuroInterventional Surg* 2021;**13**:79–85. doi:10.1136/neurintsurg-2020-016124
- 35 Mollan SP, Mitchell JL, Ottridge RS, *et al.* Effectiveness of Bariatric Surgery vs Community Weight Management Intervention for the Treatment of Idiopathic Intracranial Hypertension: A Randomized Clinical Trial. *JAMA Neurol* Published Online First: 26 April 2021. doi:10.1001/jamaneurol.2021.0659
- 36 Satti SR, Leishangthem L, Chaudry MI. Meta-Analysis of CSF Diversion Procedures and Dural Venous Sinus Stenting in the Setting of Medically Refractory Idiopathic Intracranial Hypertension. *AJNR Am J Neuroradiol* 2015;**36**:1899–904. doi:10.3174/ajnr.A4377
- 37 Kalyvas AV, Hughes M, Koutsarnakis C, *et al.* Efficacy, complications and cost of surgical interventions for idiopathic intracranial hypertension: a systematic review of the literature. *Acta Neurochir (Wien)* 2017;**159**:33–49. doi:10.1007/s00701-016-3010-2
- 38 Mortimer AM, Harrington T, Steinfort B, *et al.* Endovascular treatment of jugular bulb diverticula causing debilitating pulsatile tinnitus. *BMJ Case Rep* 2015;**2015**. doi:10.1136/bcr-2014-011609
- 39 Drescher F, Maus V, Weber W, *et al.* Pulsatile tinnitus due to an aneurysmatic diverticulum of the jugular bulb treated with the Woven EndoBridge device. *Interv Neuroradiol J Peritherapeutic Neuroradiol Surg Proced Relat Neurosci* 2020;**26**:235–8. doi:10.1177/1591019919881582
- 40 Trivelato FP, Araújo JFS, dos Santos Silva R, *et al.* Endovascular treatment of pulsatile tinnitus associated with transverse sigmoid sinus aneurysms and jugular bulb anomalies. *Interv Neuroradiol* 2015;**21**:548–51. doi:10.1177/1591019915590367
- 41 El-Begermy MA, Rabie AN. A novel surgical technique for management of tinnitus due to high dehiscence jugular bulb. *Otolaryngol Neck Surg* 2010;**142**:576–81. doi:10.1016/j.otohns.2009.12.007
- 42 Shaikh MF, Mahboubi H, German M, *et al.* A novel approach for surgical repair of dehiscence high jugular bulb: Repair of Dehiscence High Jugular Bulb. *The Laryngoscope* 2013;**123**:1803–5. doi:10.1002/lary.23891
- 43 Kim CS, Kim SY, Choi H, *et al.* Transmastoid reshaping of the sigmoid sinus: preliminary study of a novel surgical method to quiet pulsatile tinnitus of an unrecognized vascular origin. *J Neurosurg* 2016;**125**:441–9. doi:10.3171/2015.6.JNS15961



- 44 Zenteno M, Murillo-Bonilla L, Martínez S, *et al.* Endovascular treatment of a transverse—sigmoid sinus aneurysm presenting as pulsatile tinnitus: Case report. *J Neurosurg* 2004;**100**:120–2. doi:10.3171/jns.2004.100.1.0120
- 45 Gard AP, Klopper HB, Thorell WE. Successful Endovascular Treatment of Pulsatile Tinnitus Caused by a Sigmoid Sinus Aneurysm. *Interv Neuroradiol* 2009;**15**:425–8.
- 46 Houdart E, Chapot R, Merland J-J. Aneurysm of a dural sigmoid sinus: A novel vascular cause of pulsatile tinnitus. *Ann Neurol* 2000;**48**:669–71. doi:https://doi.org/10.1002/1531-8249(200010)48:4<669::AID-ANA16>3.0.CO;2-6
- 47 Sanchez TG, Murao M, Kii M, *et al.* A New Therapeutic Procedure for Treatment of Objective Venous Pulsatile Tinnitus. ;:4.
- 48 Mehanna R, Shaltoni H, Morsi H, *et al.* Endovascular treatment of sigmoid sinus aneurysm presenting as devastating pulsatile tinnitus. A case report and review of literature. *Interv Neuroradiol J Peritherapeutic Neuroradiol Surg Proced Relat Neurosci* 2010;**16**:451–4. doi:10.1177/159101991001600413
- 49 Amans MR, Stout C, Dowd CF, *et al.* Resolution of pulsatile tinnitus after coil embolization of sigmoid sinus diverticulum. *Austin J Cerebrovasc Dis* 2014;**1**.https://escholarship.org/uc/item/6vq7j3x6 (accessed 17 Apr 2021).
- 50 Wang G-P, Zeng R, Ma X-B, *et al.* Surgical Treatment of Pulsatile Tinnitus Caused by the Sigmoid Sinus Diverticulum. *Medicine (Baltimore)* 2015;**94**. doi:10.1097/MD.0000000000000882
- 51 Eisenman DJ, Raghavan P, Hertzano R, *et al.* Evaluation and treatment of pulsatile tinnitus associated with sigmoid sinus wall anomalies. *The Laryngoscope* 2018;**128**:S1–13. doi:10.1002/lary.27218
- 52 Raghavan P, Serulle Y, Gandhi D, *et al.* Postoperative Imaging Findings following Sigmoid Sinus Wall Reconstruction for Pulse Synchronous Tinnitus. *Am J Neuroradiol* 2016;**37**:136–42. doi:10.3174/ajnr.A4511
- 53 Shastri RK, Chaudhary N, Pandey AS, *et al.* Venous Diverticula Causing Pulsatile Tinnitus Treated With Coil Embolization and Stent Placement With Resolution of Symptoms: Report of Two Cases and Review of the Literature. *Otol Neurotol* 2017;**38**:e302. doi:10.1097/MAO.0000000000001540
- 54 Lenck S, Labeyrie M-A, Vallee F, *et al.* Stent Placement for Disabling Pulsatile Tinnitus Caused by a Lateral Sinus Stenosis: A Retrospective Study. *Oper Neurosurg Hagerstown Md* 2017;**13**:560–5. doi:10.1093/ons/opx026
- 55 Eliezer M, Freitas RK, Fantoni M, *et al.* Selective embolization of the mastoid emissary vein for pulsatile tinnitus treatment: when is it indicated? *J Neurointerventional Surg* 2020;**12**:999.
- 56 Abdalkader M, Ma A, Cohen M, *et al.* Endovascular coiling of large mastoid emissary vein causing pulsatile tinnitus. *Interv Neuroradiol* 2020;**26**:821–5. doi:10.1177/1591019920926333
- 57 Department of Otorhinolaryngology-Head and Neck Surgery, Jeonbuk National University School of Medicine, Jeon-ju, Korea, Kim SG, Research Institute of Clinical Medicine of Jeonbuk National University-Biomedical Research Institute of Jeonbuk National University Hospital, Jeon-ju, Korea, *et al.* Surgical ligation of A Large Mastoid Emissary Vein in A Patient Complaining of Pulsatile Tinnitus. *J Int Adv Otol* 2021;**17**:84–6. doi:10.5152/iao.2020.8086
- 58 Sheehan JP, Tanaka S, Link MJ, *et al.* Gamma Knife surgery for the management of glomus tumors: a multicenter study: Clinical article. *J Neurosurg* 2012;**117**:246–54. doi:10.3171/2012.4.JNS11214

- 59 Dobberpuhl MR, Maxwell S, Feddock J, *et al.* Treatment Outcomes for Single Modality Management of Glomus Jugulare Tumors with Stereotactic Radiosurgery. *Otol Neurotol Off Publ Am Otol Soc Am Neurotol Soc Eur Acad Otol Neurotol* 2016;**37**:1406–10. doi:10.1097/MAO.0000000000001160
- 60 Devuyst L, Defreyne L, Praet M, *et al.* Treatment of glomus tympanicum tumors by preoperative embolization and total surgical resection. *Am J Otolaryngol* 2016;**37**:544–51. doi:10.1016/j.amjoto.2016.08.011
- 61 Chung LK, Ung N, Spasic M, *et al.* Clinical outcomes of middle fossa craniotomy for superior semicircular canal dehiscence repair. *J Neurosurg* 2016;**125**:1187–93. doi:10.3171/2015.8.JNS15391
- 62 Thomeer H, Bonnard D, Castetbon V, *et al.* Long-term results of middle fossa plugging of superior semicircular canal dehiscences: clinically and instrumentally demonstrated efficiency in a retrospective series of 16 ears. *Eur Arch Otorhinolaryngol* 2016;**273**:1689–96. doi:10.1007/s00405-015-3715-5
- 63 Hillman TA, Kertesz TR, Hadley K, *et al.* Reversible Peripheral Vestibulopathy: The Treatment of Superior Canal Dehiscence. *Otolaryngol Neck Surg* 2006;**134**:431–6. doi:10.1016/j.otohns.2005.10.033
- 64 Haesendonck GV, Heyning PV de, Rompaey VV. Retrospective cohort study on hearing outcome after transmastoid plugging in superior semicircular canal dehiscence syndrome: Our Experience. *Clin Otolaryngol* 2016;**41**:601–6. doi:https://doi.org/10.1111/coa.12539
- 65 Cochran JH, Kosmicki PW. Tinnitus as a Presenting Symptom in Pernicious Anemia. *Ann Otol Rhinol Laryngol* 1979;**88**:297–297. doi:10.1177/000348947908800226
- 66 Sunwoo W, Lee DY, Lee JY, *et al.* Characteristics of tinnitus found in anemia patients and analysis of population-based survey. *Auris Nasus Larynx* 2018;**45**:1152–8. doi:10.1016/j.anl.2018.04.001
- 67 Cima RF, Maes IH, Joore MA, *et al.* Specialised treatment based on cognitive behaviour therapy versus usual care for tinnitus: a randomised controlled trial. *The Lancet* 2012;**379**:1951–9. doi:10.1016/S0140-6736(12)60469-3
- 68 Liang Z, Yang H, Cheng G, *et al.* Repetitive transcranial magnetic stimulation on chronic tinnitus: a systematic review and meta-analysis. *BMC Psychiatry* 2020;**20**:547. doi:10.1186/s12888-020-02947-9
- 69 Meng Z, Liu S, Zheng Y, *et al.* Repetitive transcranial magnetic stimulation for tinnitus. *Cochrane Database Syst Rev* Published Online First: 2011. doi:10.1002/14651858.CD007946.pub2
